# Supplementary material
Source: Springer Nature journal article supplement (https://www.springermedizin.de/resource/supplementary/13256_2011_2189_MOESM1_ESM.pdf/9649260)

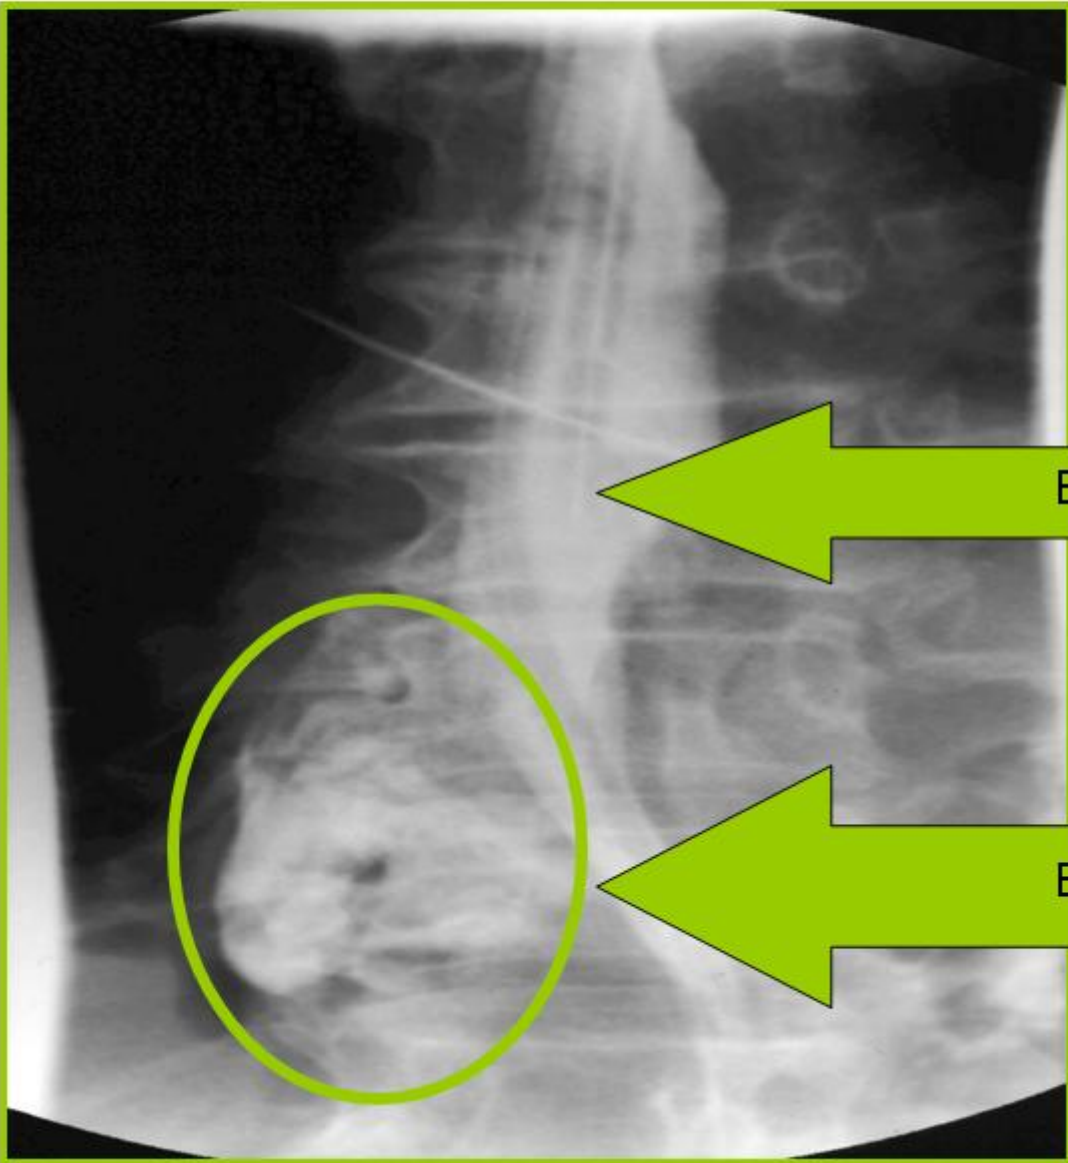

Endotracheal Tube

Esophageal Rupture

Supplement: MOESM1 [file 9649260]
